# Supplementary material
Source: Royal Society of Chemistry journal article supplement (doi:10.1039/d6gc01918h)
Supplement: d6gc01918h1.pdf [file d6gc01918h1.pdf]

## Supporting Information

### **Stereoselective decarboxylation of $\beta$ -functionalized carboxylic acids enabled by engineered fatty acid photodecarboxylase**

*Xinping Zhang, Jieyu Zhou\*, Jie Zhang, Xiangyuan Gu, Huiru Wang, Shunyu Zhao,*

*Feifan Luo, Ye Ni\**

State Key Laboratory of Food Science and Resources, Jiangnan University, Wuxi

214122, Jiangsu, China

Key laboratory of industrial Biotechnology, Ministry of Education, School of

Biotechnology, Jiangnan University, Wuxi 214122, Jiangsu, China

Key Laboratory of Industrial Synthetic Biology of Jiangsu Province, Jiangnan

University, Wuxi 214122, China

\*Corresponding authors

Dr. Jieyu Zhou

E-mail address: [zhoujieyu@jiangnan.edu.cn](mailto:zhoujieyu@jiangnan.edu.cn)

ORCID: 0000-0003-3292-0314

Prof. Ye Ni

E-mail address: [yni@jiangnan.edu.cn](mailto:yni@jiangnan.edu.cn)

ORCID: 0000-0003-4887-7517

## Contents

|                                                                                                                                                                    |    |
|--------------------------------------------------------------------------------------------------------------------------------------------------------------------|----|
| <b>Table S1.</b> List of abbreviations.....                                                                                                                        | 4  |
| <b>Table S2.</b> Preliminary screening of N575 mutants for decarboxylation of $\beta$ -hydroxydecanoic acid.....                                                   | 5  |
| <b>Table S3.</b> Statistical significance analysis of all variants relative to WT (Dunnett's test).<br>.....                                                       | 6  |
| <b>Table S4.</b> Binding free energies between substrate 1a and WT CvFAP, V463A and V463T (from three parallel replicates).....                                    | 7  |
| <b>Table S5.</b> Primer sequences used for site-saturation mutagenesis of residue V463. ....                                                                       | 8  |
| <b>Figure S1.</b> GC-MS analysis of enzymatic decarboxylation product 2-nonanol.....                                                                               | 9  |
| <b>Figure S2.</b> SDS-PAGE analysis for the expression of WT and mutants of CvFAP..                                                                                | 10 |
| <b>Figure S3.</b> Comparison of decarboxylation yield of $\beta$ -hydroxycarboxylic acid substrates by V463 variants. ....                                         | 11 |
| <b>Figure S4.</b> Evaluation of photostability of WT, V463A and V463T..                                                                                            | 12 |
| <b>Figure S5.</b> GC data and GC-MS data for the light-driven chiral production 2c. ....                                                                           | 13 |
| <b>Figure S6.</b> GC data and GC-MS data for the light-driven chiral production 3c. ....                                                                           | 14 |
| <b>Figure S7.</b> GC data for the light-driven chiral production 1c. ....                                                                                          | 15 |
| <b>Figure S8.</b> GC data and GC-MS data for the light-driven chiral production 4c. ....                                                                           | 16 |
| <b>Figure S9.</b> Electrostatic interaction energy (Kcal/mol) of substrate $\beta$ -hydroxydecanoic acid (1a) with key residues of WT CvFAP, V463A and V463T. .... | 17 |
| <b>Figure S10.</b> Kinetic measurement of WT CvFAP, V463A and V463T with $\beta$ -hydroxydecanoic acid (1a)..                                                      | 18 |
| <b>Figure S11.</b> Representative cluster structures of WT with ( <i>S</i> )/( <i>R</i> )-1a/2a/3a/4a.....                                                         | 19 |
| <b>Figure S12.</b> Molecular dynamics simulations of WT with ( <i>S</i> )/( <i>R</i> )-1a/2a/3a/4a.....                                                            | 20 |
| <b>Figure S13.</b> Statistics of key hydrogen bonds for FAD anchoring in WT CvFAP, V463A, and V463T variants from molecular dynamics simulations.....              | 21 |

|                                                                                     |    |
|-------------------------------------------------------------------------------------|----|
| <b>Figure S14.</b> Photoreactor used in this study..                                | 23 |
| <b>Figure S15.</b> Standard curve for the quantification of 2-nonanol (1c)..        | 24 |
| <b>Figure S16.</b> Standard curve for the quantification of 2-pentanol (2c)..       | 27 |
| <b>Figure S17.</b> Standard curve for the quantification of 2-heptanol (3c)..       | 25 |
| <b>Figure S18.</b> Standard curve for the quantification of 2-undecanol (4c)..      | 26 |
| <b>Figure S19.</b> SDS-PAGE analysis of purified WT and variants enzymes of CvFAP.. | 28 |
| <b>Experimental Section</b>                                                         | 29 |

## Supplementary Tables:

**Table S1.** List of abbreviations.

| <b>Abbreviations</b> | <b>Name</b>                                                    |
|----------------------|----------------------------------------------------------------|
| CvFAP                | Fatty acid photodecarboxylase from <i>Chlorella variabilis</i> |
| FAD                  | Flavin Adenine Dinucleotide                                    |
| A                    | Alanine (Ala)                                                  |
| F                    | Phenylalanine (Phe)                                            |
| I                    | Isoleucine (Ile)                                               |
| S                    | Serine (Ser)                                                   |
| H                    | Histidine (His)                                                |
| E                    | Glutamic acid (Glu)                                            |
| D                    | Aspartic acid (Asp)                                            |
| T                    | Threonine (Thr)                                                |
| Y                    | Tyrosine (Tyr)                                                 |
| N                    | Asparagine (Asn)                                               |
| R                    | Arginine (Arg)                                                 |
| K                    | Lysine (Lys)                                                   |
| Q                    | Glutamine (Gln)                                                |
| W                    | Tryptophan (Trp)                                               |
| G                    | Glycine (Gly)                                                  |
| P                    | Proline (Pro)                                                  |
| M                    | Methionine (Met)                                               |
| C                    | Cysteine (Cys)                                                 |
| L                    | Leucine (Leu)                                                  |
| V                    | Valine (Val)                                                   |
| MD simulations       | Molecular Dynamics simulations                                 |
| GC-MS                | Gas Chromatography-Mass Spectrometry                           |
| FRISM                | Focused Rational Iterative Site-specific Mutagenesis           |
| SSM                  | site-saturation mutagenesis                                    |
| ROS                  | reactive oxygen species                                        |
| 1-NITC               | 1-naphthyl isothiocyanate                                      |
| HPLC-UV              | High Performance Liquid Chromatography-Ultraviolet             |
| DMF                  | dimethylformamide                                              |

**Table S2.** Preliminary screening of N575 mutants for decarboxylation of  $\beta$ -hydroxydecanoic acid.

| <b>Enzyme</b> | <b>2-Nonanol (mM)</b> |
|---------------|-----------------------|
| WT            | 1.136                 |
| N575A         | ND                    |
| N575F         | 1.448                 |
| N575I         | ND                    |
| N575S         | ND                    |
| N575H         | ND                    |
| N575E         | ND                    |
| N575D         | ND                    |
| N575R         | ND                    |
| N575Q         | 0.471                 |
| N575K         | ND                    |
| N575Y         | 0.594                 |
| N575P         | ND                    |
| N575T         | ND                    |
| N575G         | ND                    |
| N575W         | ND                    |
| N575M         | ND                    |
| N575C         | ND                    |
| N575L         | ND                    |
| N575V         | ND                    |

ND, not detected.

**Table S3.** Statistical significance analysis of all variants relative to WT (Dunnett's test).

| Dunnett's multiple comparisons test | Significant | Summary | Adjusted P Value |
|-------------------------------------|-------------|---------|------------------|
| WT vs. V463K (K)                    | No          | ns      | 0.1572           |
| WT vs. V463D (D)                    | No          | ns      | 0.1398           |
| WT vs. V463E (E)                    | Yes         | *       | 0.0355           |
| WT vs. V463Q (Q)                    | Yes         | *       | 0.0398           |
| WT vs. V463N (N)                    | Yes         | ****    | <0.0001          |
| WT vs. V463H (H)                    | Yes         | ****    | <0.0001          |
| WT vs. V463Y (Y)                    | Yes         | ****    | <0.0001          |
| WT vs. V463W (W)                    | Yes         | ****    | <0.0001          |
| WT vs. V463S (S)                    | Yes         | ****    | <0.0001          |
| WT vs. V463T (T)                    | Yes         | ****    | <0.0001          |
| WT vs. V463G (G)                    | Yes         | *       | 0.0440           |
| WT vs. V463P (P)                    | Yes         | *       | 0.0108           |
| WT vs. V463A (A)                    | Yes         | ****    | <0.0001          |
| WT vs. V463M (M)                    | Yes         | ****    | <0.0001          |
| WT vs. V463C (C)                    | Yes         | ****    | <0.0001          |
| WT vs. V463F (F)                    | No          | ns      | 0.2671           |
| WT vs. V463L (L)                    | No          | ns      | 0.8559           |
| WT vs. V463R (R)                    | No          | ns      | 0.9990           |
| WT vs. V463I (I)                    | Yes         | *       | 0.0394           |
| WT vs. S574A/V463A                  | Yes         | ****    | <0.0001          |
| WT vs. N575F/V463A                  | Yes         | ****    | <0.0001          |
| WT vs. Y466A/V463A                  | Yes         | ****    | <0.0001          |
| WT vs. S574A/V463T                  | Yes         | ****    | <0.0001          |
| WT vs. N575F/V463T                  | Yes         | ****    | <0.0001          |
| WT vs. Y466A/V463T                  | Yes         | ****    | <0.0001          |
| WT vs. S574A/V463S                  | Yes         | ****    | <0.0001          |
| WT vs. N575F/V463S                  | Yes         | ****    | <0.0001          |
| WT vs. Y466A/V463S                  | Yes         | **      | 0.0015           |
| WT vs. Y466A/S574A                  | Yes         | ****    | <0.0001          |
| WT vs. N575F/S574A                  | Yes         | **      | 0.0013           |
| WT vs. Y466A/N575F                  | No          | ns      | 0.9957           |
| WT vs. Y466A/N575F/V463T            | No          | ns      | >0.9999          |
| WT vs. Y466A/S574A/V463A            | Yes         | **      | 0.0064           |
| WT vs. Y466A/N575F/V463S            | Yes         | ****    | <0.0001          |
| WT vs. N575F/S574A/V463S            | Yes         | ****    | <0.0001          |
| WT vs. N575F/S574A/V463T            | Yes         | *       | 0.0475           |
| WT vs. N575F/S574A/V463A            | No          | ns      | 0.9993           |
| WT vs. Y466A/N575F/V463A            | No          | ns      | 0.7517           |
| WT vs. Y466A/N575F/S574A            | Yes         | **      | 0.0037           |

**Table S4.** Binding free energies between substrate 1a and WT CvFAP, V463A and V463T (from three parallel replicates).

| <b>Enzyme</b> | <b>Binding free energy (kJ/mol)</b> |
|---------------|-------------------------------------|
| WT            | $-440.4 \pm 36.0$                   |
| V463T         | $-640.8 \pm 68.0$                   |
| V463A         | $-582.7 \pm 15.2$                   |

**Table S5.** Primer sequences used for site-saturation mutagenesis of residue V463.

| <b>Mutation</b> | <b>Sequence</b>             |
|-----------------|-----------------------------|
| V463A forward   | GATCCGGATGGCGCTAGCACCTATGTG |
| V463A reverse   | CACATAGGTGCTAGCGCCATCCGGATC |
| V463F forward   | GATCCGGATGGCTTTAGCACCTATGTG |
| V463F reverse   | CACATAGGTGCTAAAGCCATCCGGATC |
| V463I forward   | GATCCGGATGGCATTAGCACCTATG   |
| V463I reverse   | CACATAGGTGCTAATGCCATCCGGA   |
| V463E forward   | GATCCGGATGGCGAAAGCACCTATG   |
| V463E reverse   | CACATAGGTGCTTTCGCCATCCGGA   |
| V463H forward   | GATCCGGATGGCCATAGCACCTATG   |
| V463H reverse   | CACATAGGTGCTATGGCCATCCGGA   |
| V463S forward   | GATCCGGATGGCTCTAGCACCTATG   |
| V463S reverse   | CACATAGGTGCTAGAGCCATCCGGAT  |
| V463L forward   | GATCCGGATGGCCTTAGCACCTATGT  |
| V463L reverse   | CACATAGGTGCTAAGGCCATCCGGA   |
| V463I forward   | GATCCGGATGGCATTAGCACCTATGT  |
| V463I reverse   | CACATAGGTGCTAATGCCATCCGGA   |
| V463P forward   | GATCCGGATGGCCCTAGCACCTATGT  |
| V463P reverse   | CACATAGGTGCTAGGGCCATCCGGA   |
| V463Y forward   | GATCCGGATGGCTATAGCACCTATGT  |
| V463Y reverse   | CACATAGGTGCTATAGCCATCCGGA   |
| V463W forward   | GATCCGGATGGCTGGAGCACCTATGT  |
| V463W reverse   | CACATAGGTGCTCCAGCCATCCGGA   |
| V463T forward   | GATCCGGATGGCACTAGCACCTATGT  |
| V463T reverse   | CACATAGGTGCTAGTGCCATCCGGA   |
| V463C forward   | GATCCGGATGGCTGTAGCACCTATGT  |
| V463C reverse   | CACATAGGTGCTACAGCCATCCGGA   |
| V463N forward   | GATCCGGATGGCAATAGCACCTATGT  |
| V463N reverse   | CACATAGGTGCTATTGCCATCCGGA   |
| V463Q forward   | GATCCGGATGGCAAAGCACCTATGT   |
| V463Q reverse   | CACATAGGTGCTTTGGCCATCCGGA   |
| V463K forward   | GATCCGGATGGCAAAGCACCTATGT   |
| V463K reverse   | CACATAGGTGCTTTTGCCATCCGGA   |
| V463R forward   | GATCCGGATGGCCGTAGCACCTATGT  |
| V463R reverse   | CACATAGGTGCTACGGCCATCCGGA   |
| V463G forward   | GATCCGGATGGCGGTAGCACCTATGT  |
| V463G reverse   | CACATAGGTGCTACCGCCATCCGG    |
| V463M forward   | GATCCGGATGGCATGAGCACCTATGT  |
| V463M reverse   | CACATAGGTGCTCATGCCATCCGG    |
| V463D forward   | GATCCGGATGGCGATAGCACCTATGT  |
| V463D reverse   | CACATAGGTGCTATCGCCATCCGG    |

## Supplementary Figures:

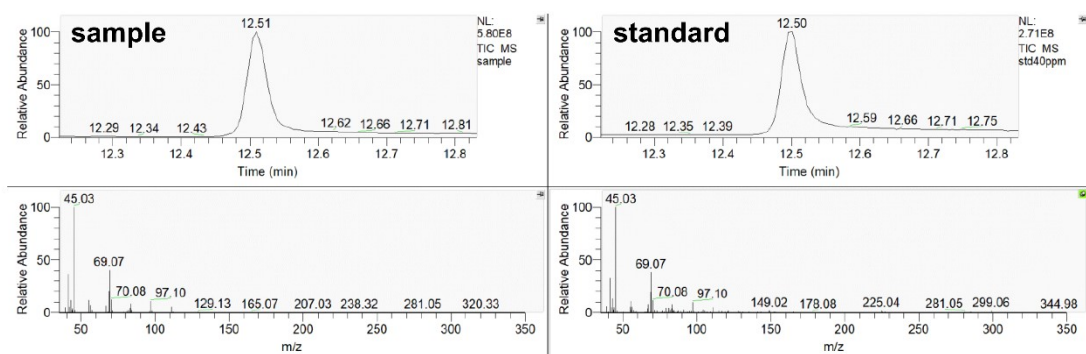

**Figure S1.** GC-MS analysis of enzymatic decarboxylation product 2-nonanol. (Left: mass spectrum of enzymatic product by WT; Right: mass spectrum of 2-nonanol reference standard.)

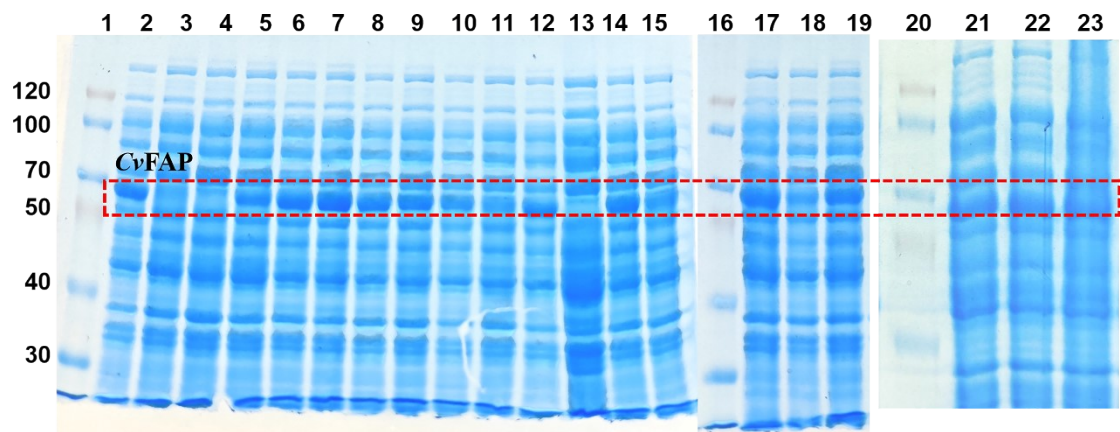

**Figure S2.** SDS-PAGE analysis for the expression of WT and mutants of CvfFAP. Lane 1, 16 and 20: protein markers. Lane 1-15: crude enzyme of WT CvfFAP, V463I, V463L, V463F, V463C, V463M, V463A, V463P, V463G, V463T, V463S, V463W, V463Y, V463H. Lane 17-19: crude enzyme of V463N, V463Q, V463E. Lane 21-23: crude enzyme of V463D, V463K, V463R.

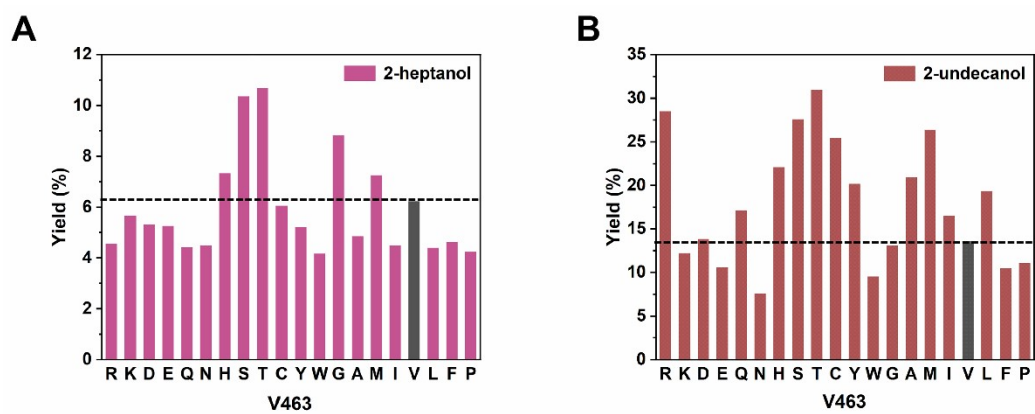

**Figure S3.** Comparison of decarboxylation yield of  $\beta$ -hydroxycarboxylic acid substrates by V463 variants. A)  $\beta$ -hydroxyoctanoic acid. B)  $\beta$ -hydroxydodecanoic acid. (the single-letter codes denote the corresponding amino acids)

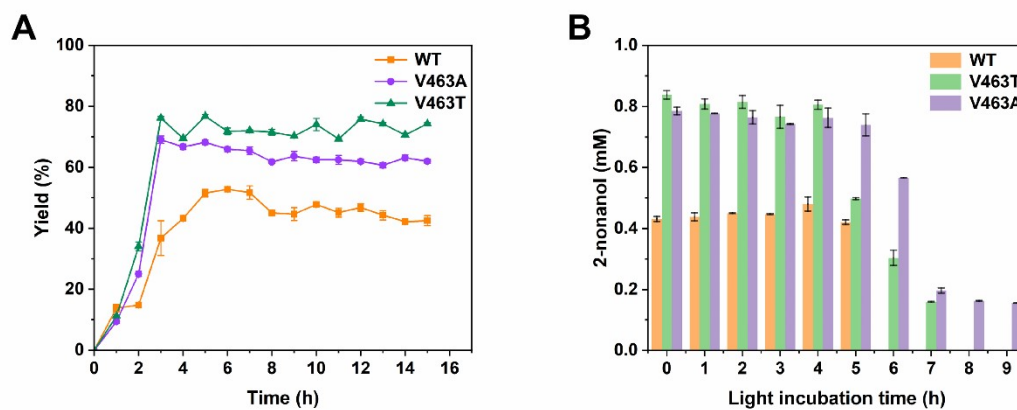

**Figure S4.** Evaluation of photostability of WT, V463A and V463T. A) Time course of decarboxylation. B) Photostability.

Reaction conditions:  $\beta$ -hydroxydecanoic acid (substrate final concentration: 10 mM), crude enzyme solution (0.5 g wet cell in 10 mL pH 7.5 Tris-HCl), irradiation of blue LEDs at 20 °C. Samples (500  $\mu$ L) were collected hourly for GC analysis.

Reaction conditions of photostability: crude enzyme (0.5 g wet cell in 10 mL pH 7.5 Tris-HCl) exposed to the blue LEDs at 20 °C,  $\beta$ -hydroxydecanoic acid (final concentration: 1 mM). Samples (1 mL) were taken every hour.

## GC data and Gas chromatography-mass spectrometry (GC-MS) analysis of light-driven production of chiral alcohol.

2c, chiral GC (Agilent CYCLOSIL-B, TR = 14.9 min, TS = 15.3 min, temperature conditions: initial temperature 40 °C, holding 10 min, then 2 °C/min to 80 °C, then 30 °C/min to 210 °C, holding 5 min).

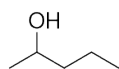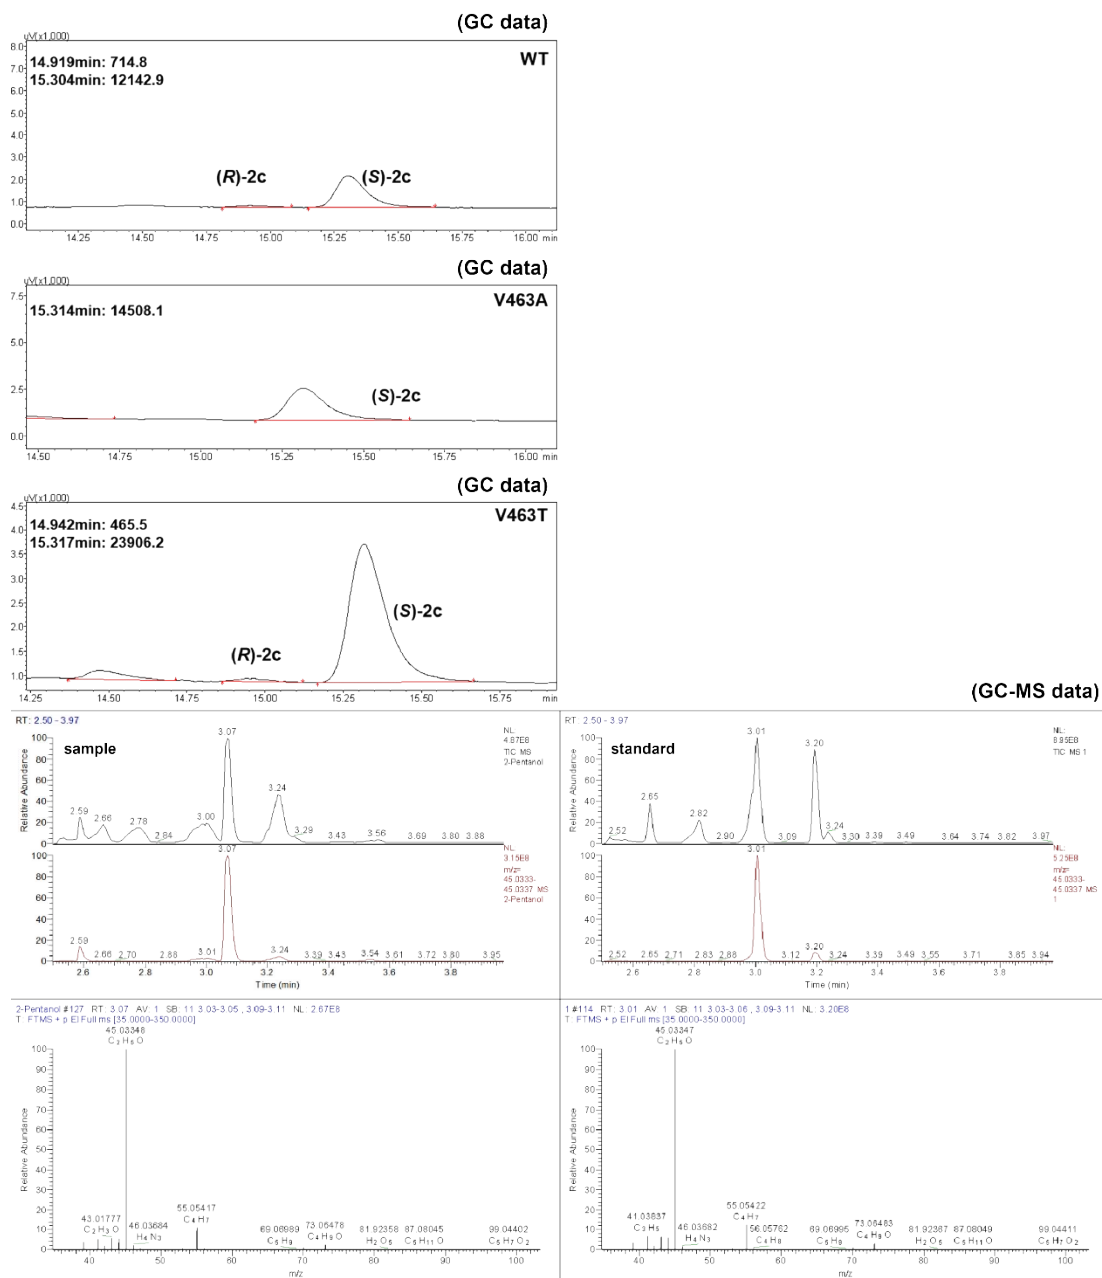

Figure S5. GC data and GC-MS data for the light-driven chiral production 2c.

3c, chiral GC (Agilent CYCLOSIL-B, TR =32.82 min, TS =33.0 min, temperature conditions: initial temperature 40 °C, holding 10 min, then 2 °C/min to 100 °C, then 30 °C/min to 220 °C, holding 5 min).

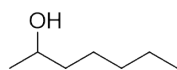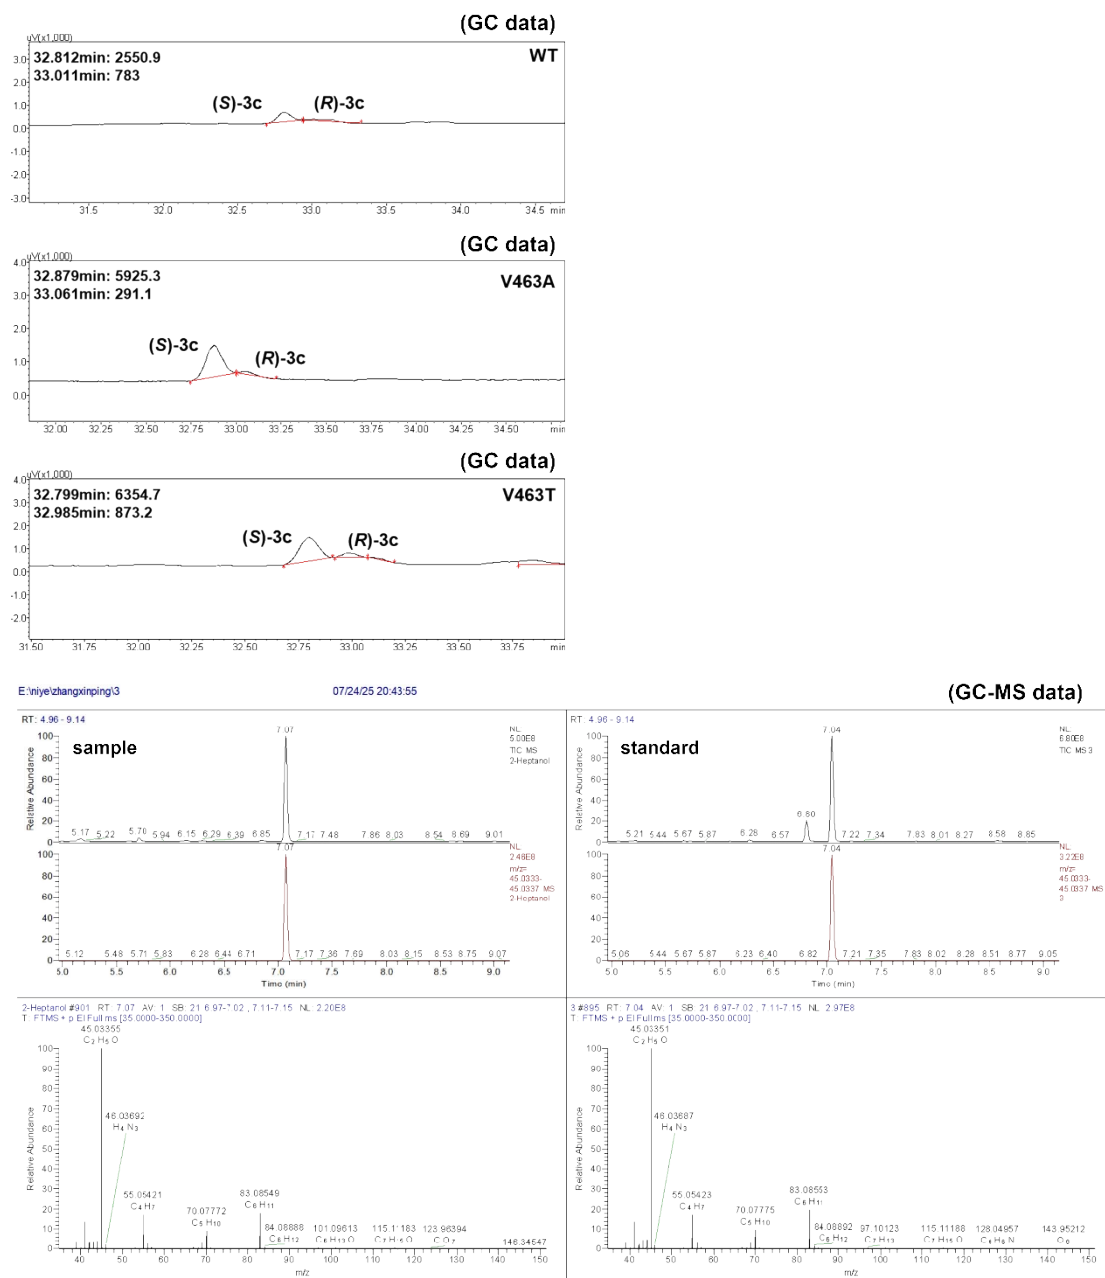

Figure S6. GC data and GC-MS data for the light-driven chiral production 3c.

1c, chiral GC (Agilent CP7502, TR = 31.2 min, TS = 31.6 min,<sup>1</sup> temperature conditions: initial temperature 80 °C, holding 20 min, then 1 °C/min to 120 °C, then 30 °C/min to 180 °C, holding 3 min).

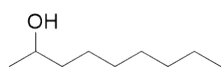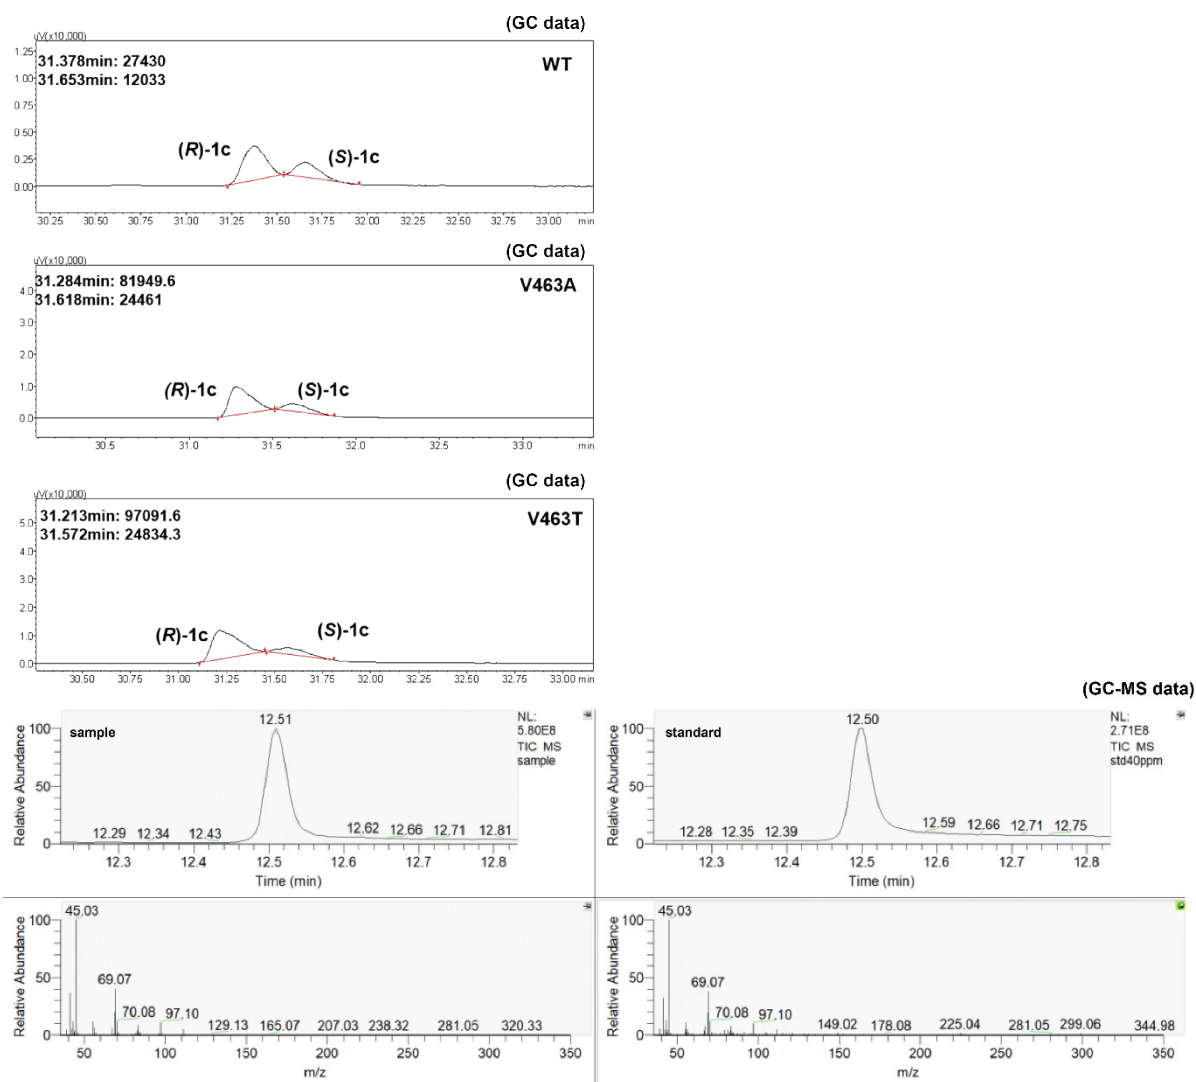

**Figure S7.** GC data and GC-MS data for the light-driven chiral production 1c.

4c, chiral GC (Agilent CP7502, TR = 41.1 min, TS = 41.5 min, temperature conditions: initial temperature 100 °C, holding 10 min, then 0.5 °C/min to 150 °C, then 30 °C/min to 190 °C, holding 3 min).

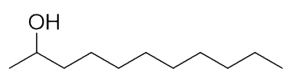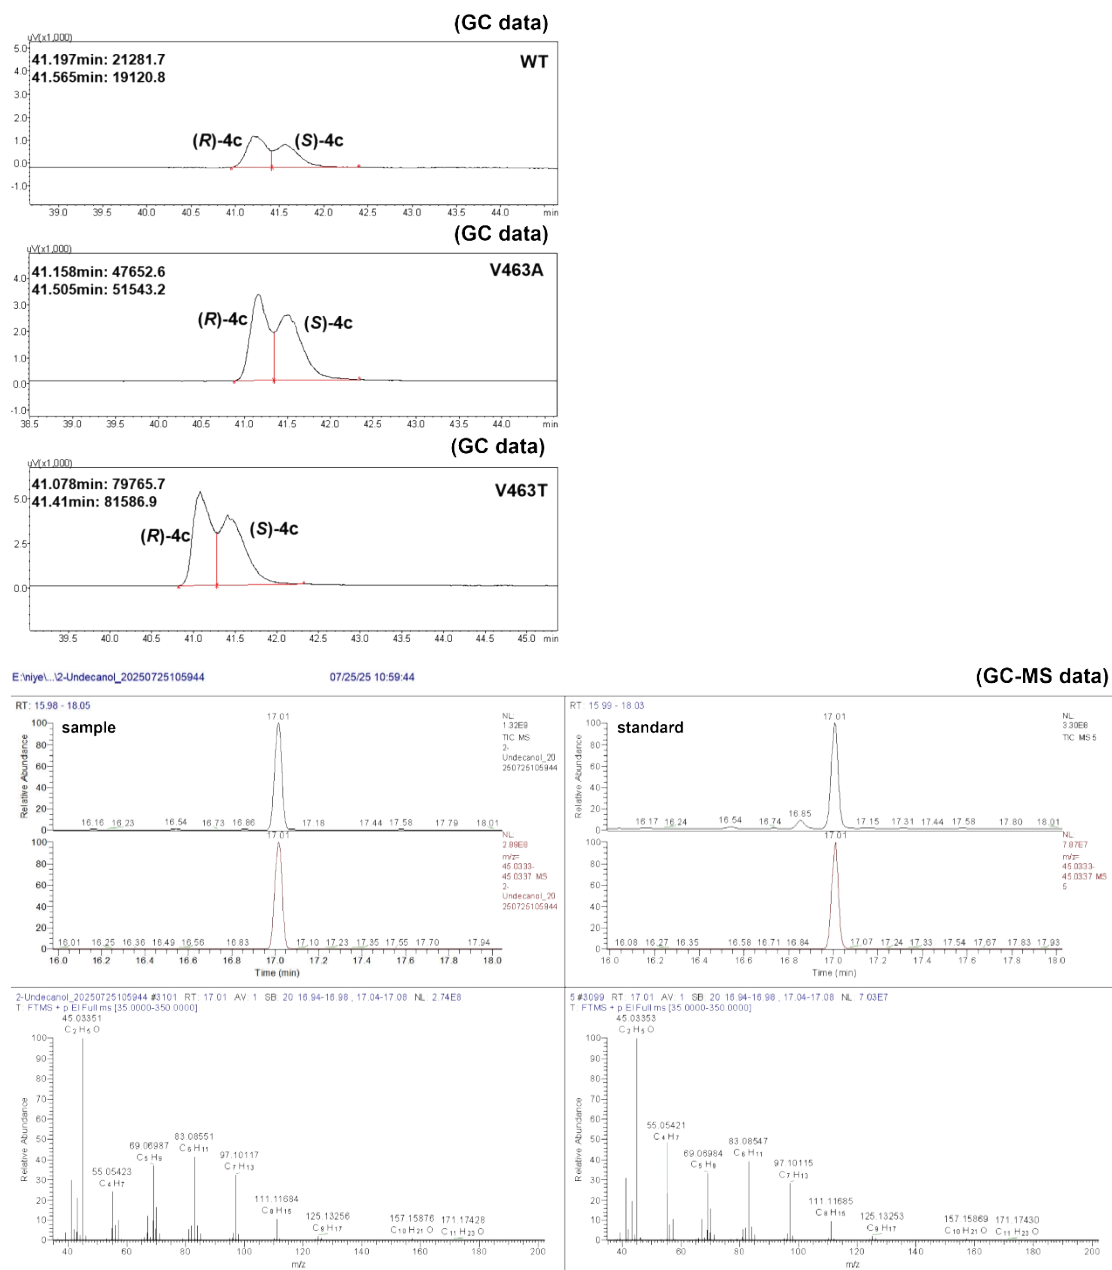

Figure S8. GC data and GC-MS data for the light-driven chiral production 4c.

## Electrostatic Interaction Energy (Kcal/mol)

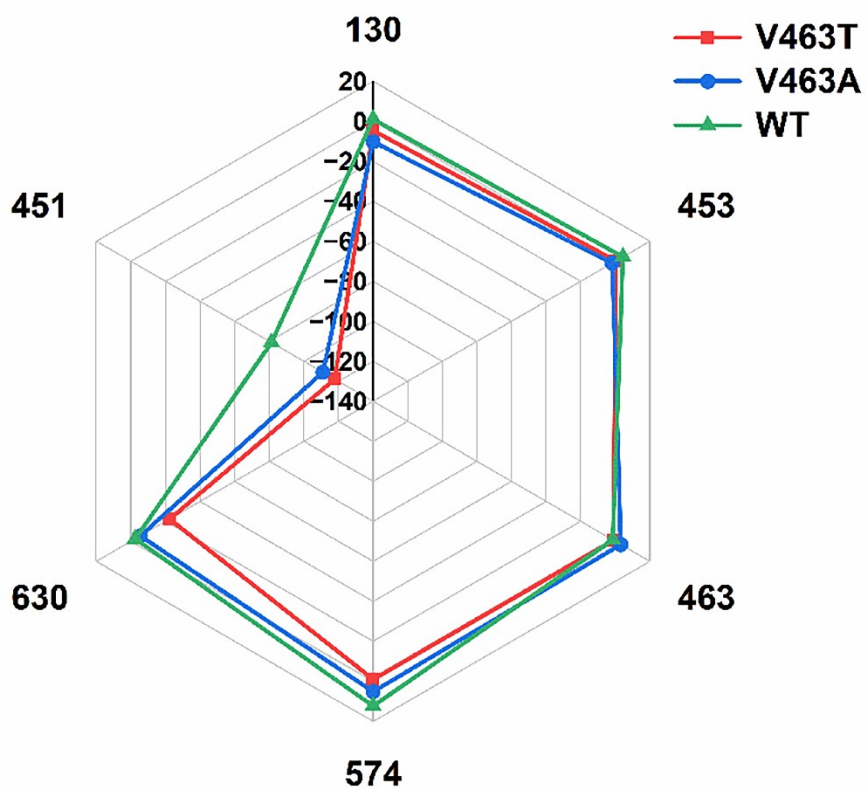

**Figure S9.** Electrostatic interaction energy (Kcal/mol) of substrate  $\beta$ -hydroxydecanoic acid (1a) with key residues of WT CvFAP, V463A and V463T.

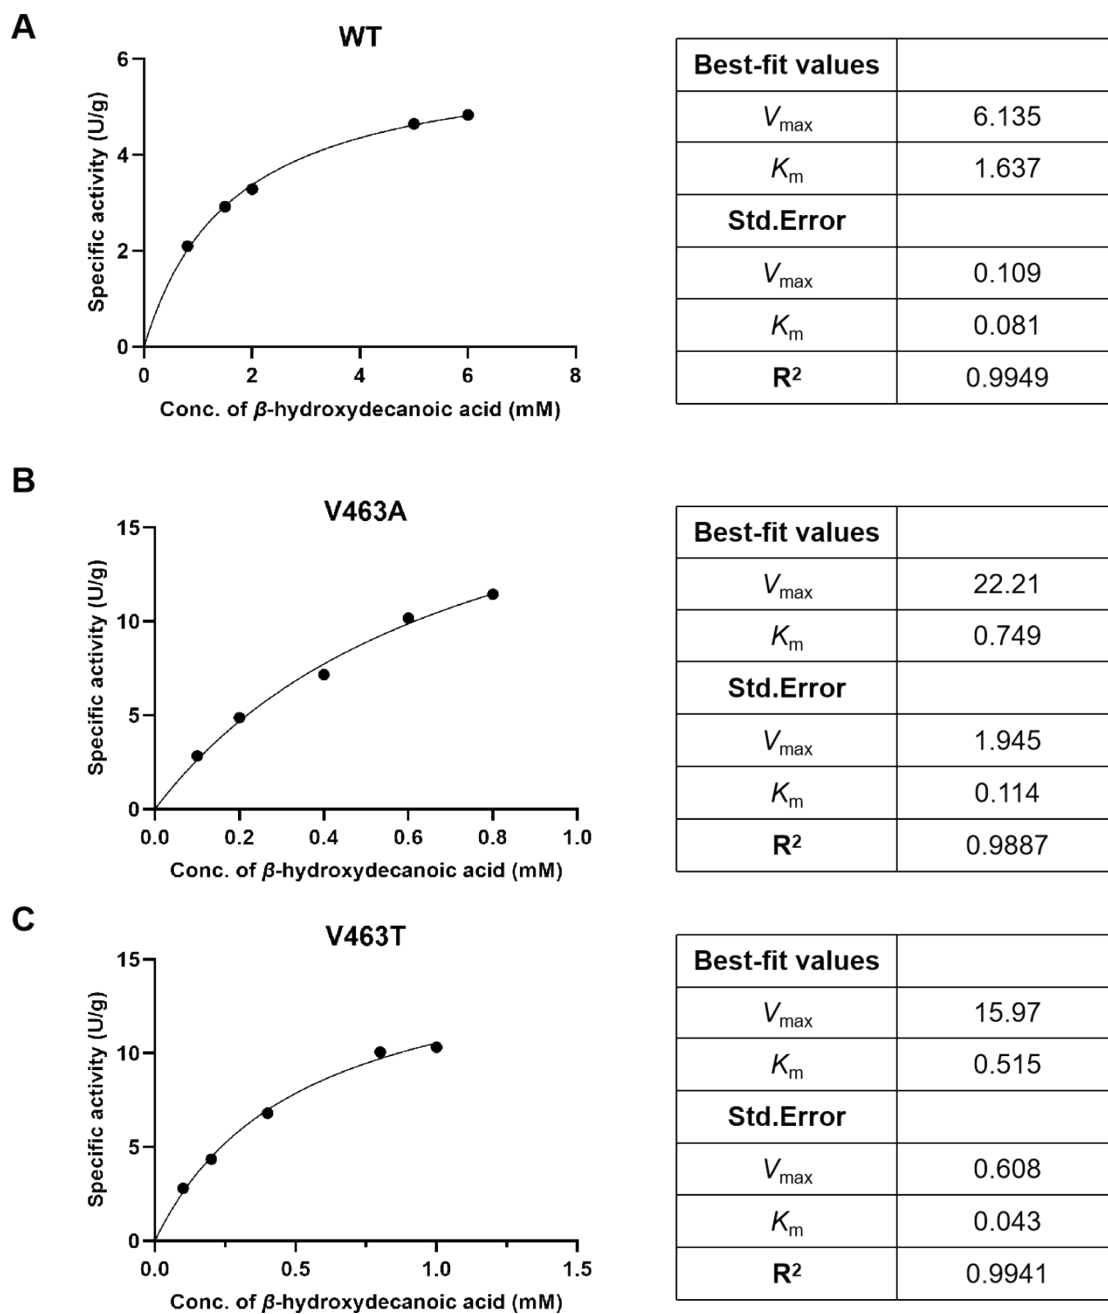

**Figure S10.** Kinetic measurement of WT CvFAP, V463A and V463T with  $\beta$ -hydroxydecanoic acid (1a). A) WT. B) V463A. C) V463T. The data were fitted using nonlinear regression to the Michaelis-Menten equation in GraphPad Prism 8.

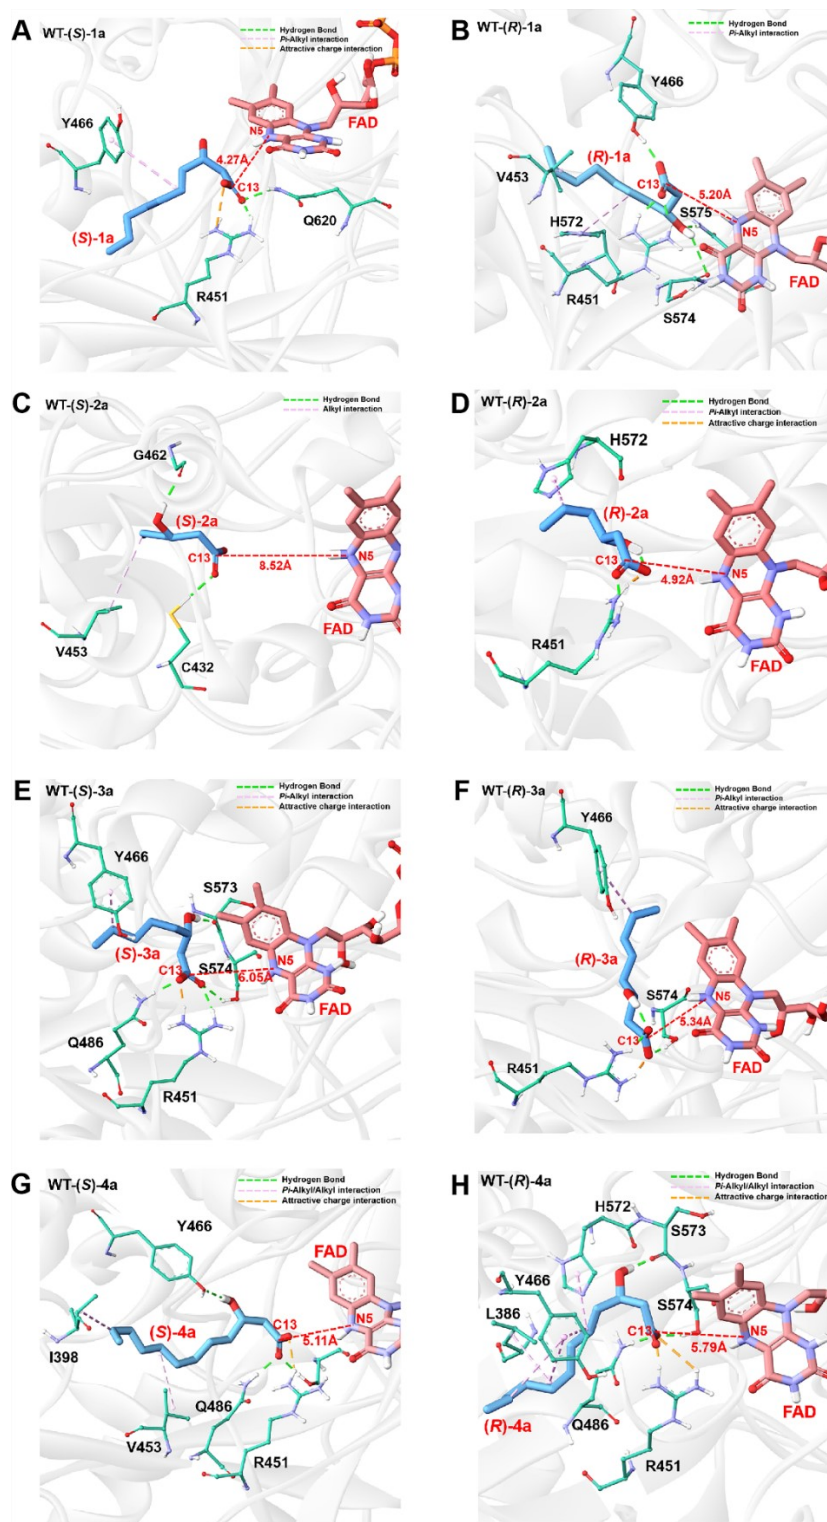

**Figure S11.** Representative cluster structures of WT with (S)/(R)-1a/2a/3a/4a. A) (S)-1a. B) (R)-1a. C) (S)-2a. D) (R)-2a. E) (S)-3a. F) (R)-3a. G) (S)-4a. H) (R)-4a.

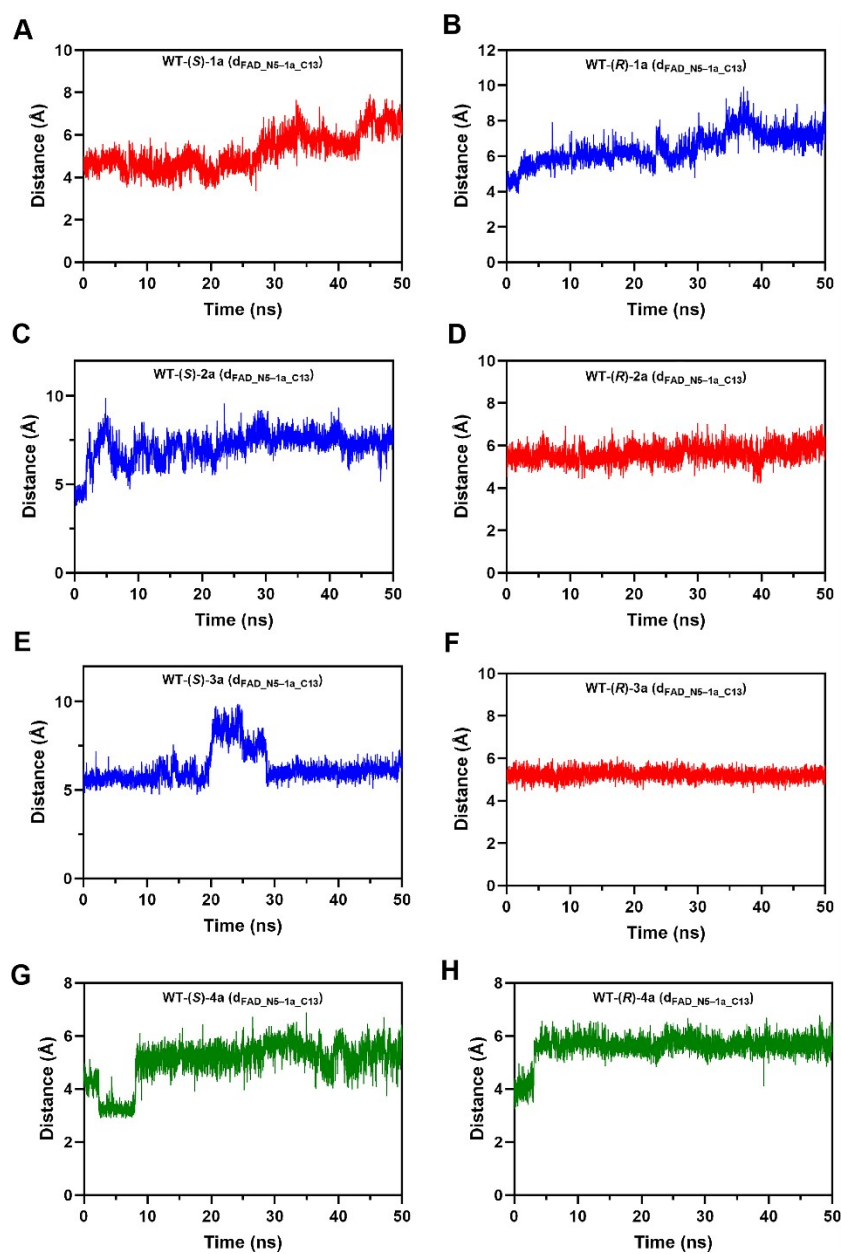

**Figure S12.** Molecular dynamics simulations of WT with (S)/(R)-1a/2a/3a/4a. A) (S)-1a. B) (R)-1a. C) (S)-2a. D) (R)-2a. E) (S)-3a. F) (R)-3a. G) (S)-4a. H) (R)-4a.

Here, the red solid line represents the preferred conformation of WT, the blue dashed line represents the disfavored conformation, and the green line indicates conformations with no significant selectivity.

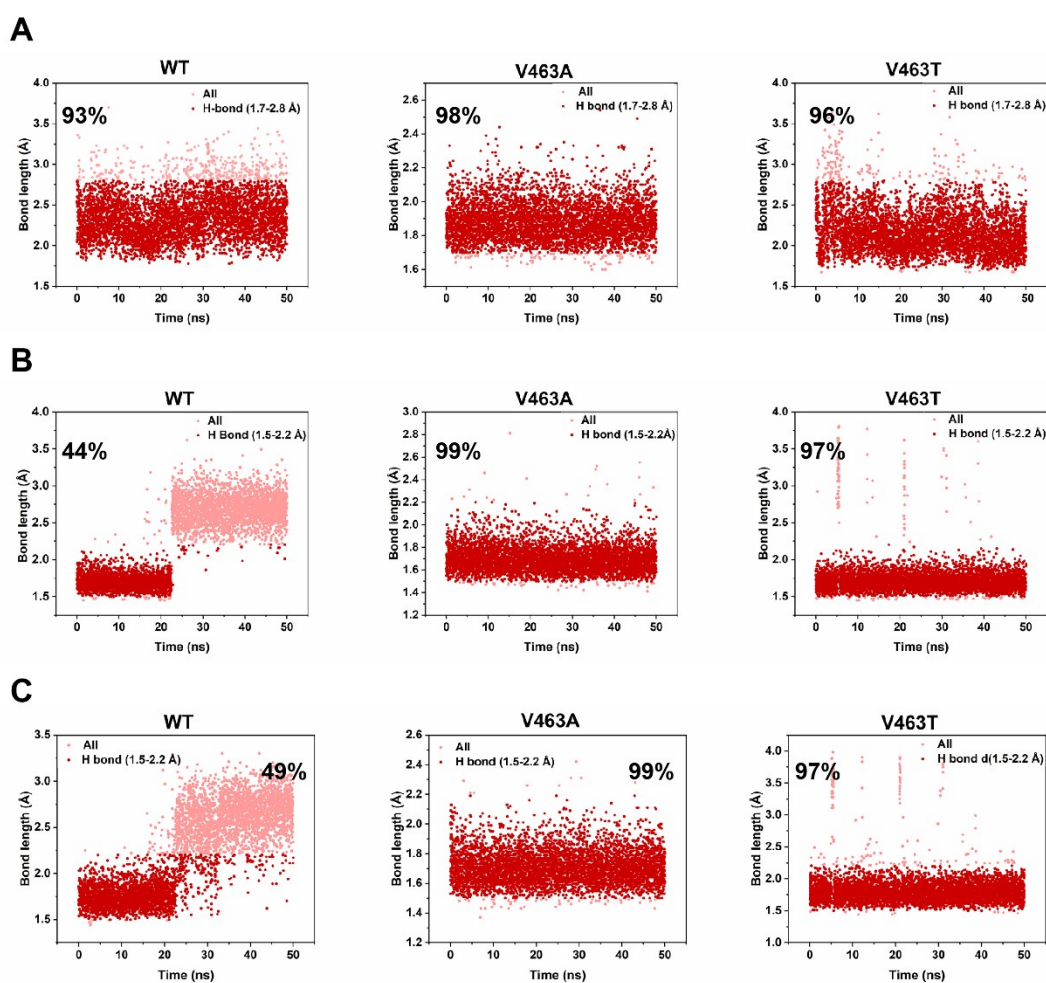

**Figure S13.** Statistics of key hydrogen bonds for FAD anchoring in WT C<sub>v</sub>FAP, V463A, and V463T variants from molecular dynamics simulations. A) Statistics of H-bond<sup>FAD\_O2-FAP</sup>. B) Statistics of H-bond<sup>FAD\_H5-FAP</sup>. C) Statistics of H-bond<sup>FAD\_H7-FAP</sup>. Here, H-bond<sup>FAD\_O2-FAP</sup> means H-bond formation between FAD\_O2 (acceptor) and FAP\_NH2 (donor), the probability was calculated for D-A distances within the canonical range of 1.7-2.8 Å, H-bond<sup>FAD\_H5-FAP</sup> means H-bond formation between FAD\_H5 (donor) and FAP\_O784 (acceptor), the probability was calculated for D-A distances within the canonical range of 1.5-2.2 Å, H-bond<sup>FAD\_H7-FAP</sup> means H-bond

formation between FAD\_H7 (donor) and FAP\_O785 (acceptor), the probability was calculated for D-A distances within the canonical range of 1.5-2.2 Å.

**A**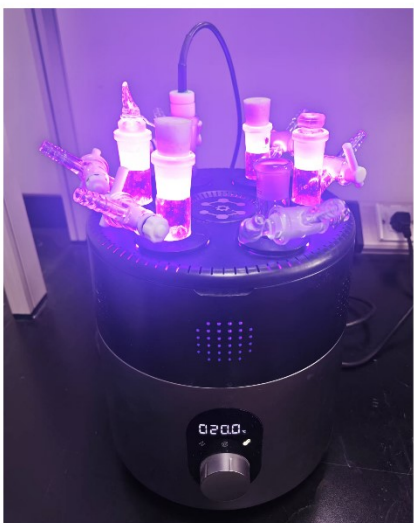**B**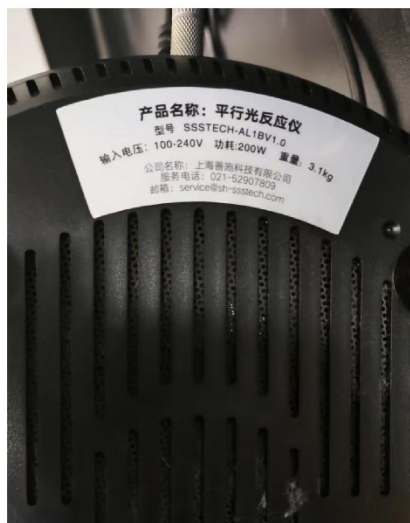

**Figure S14.** Photoreactor used in this study. A) Photoreactor. B) Manufacturer information: Shanshi Technology Co., Ltd. (Shanghai, China); model: SSSTECH-AL1BV1.0.

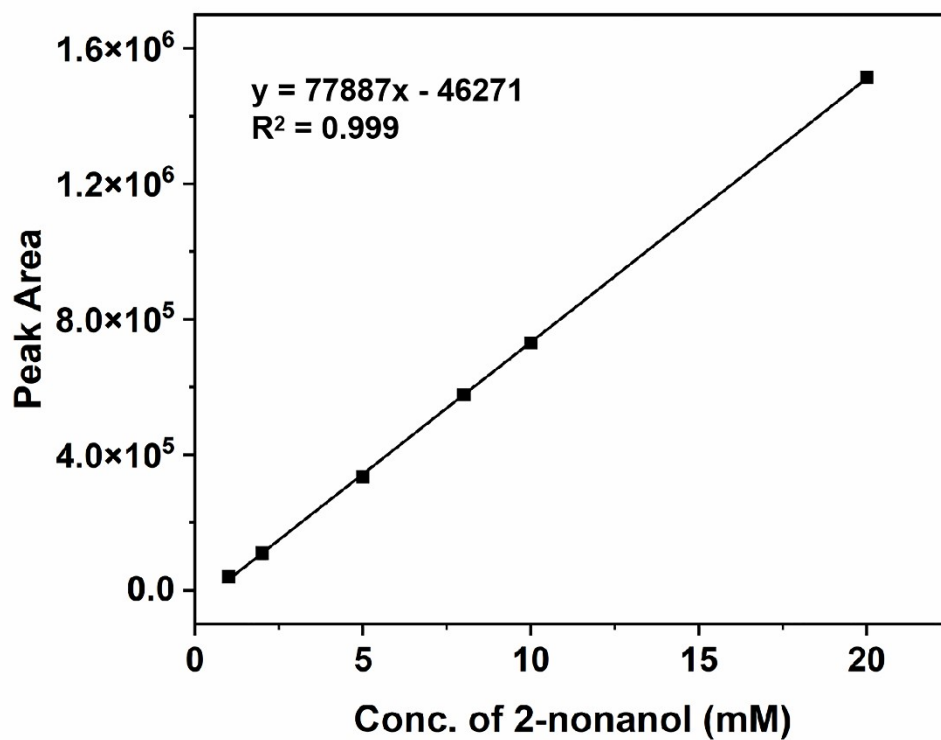

**Figure S15.** Standard curve for the quantification of 2-nonanol (1c). (Agilent HP-5, temperature conditions: initial temperature 40 °C, holding 1 min, then 10 °C/min to 120 °C, then 30 °C/min to 250 °C, holding 5 min).

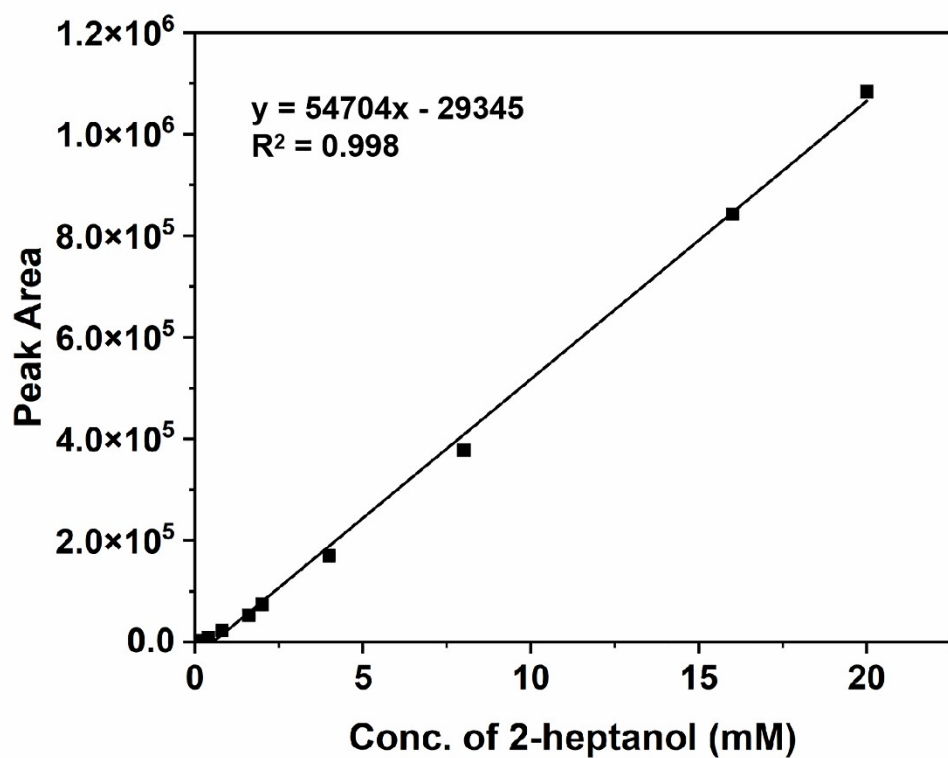

**Figure S16.** Standard curve for the quantification of 2-heptanol (3c). (Agilent HP-5, temperature conditions: initial temperature 40 °C, holding 1 min, then 10 °C/min to 120 °C, then 30 °C/min to 250 °C, holding 5 min).

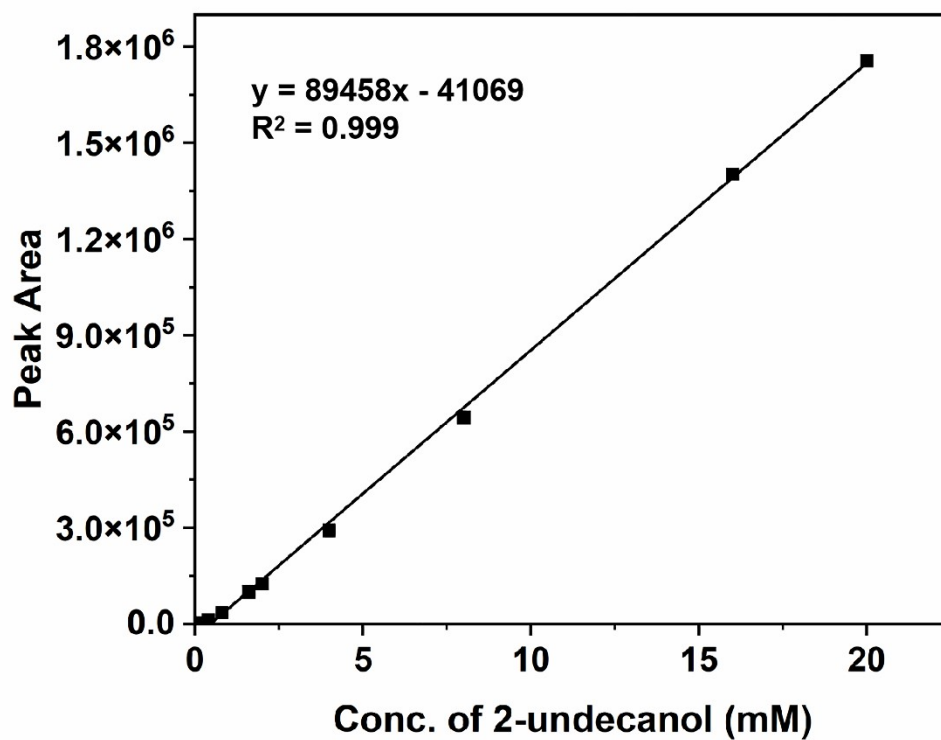

**Figure S17.** Standard curve for the quantification of 2-undecanol (4c). (Agilent HP-5, temperature conditions: initial temperature 40 °C, holding 1 min, then 10 °C/min to 120 °C, then 30 °C/min to 250 °C, holding 5 min).

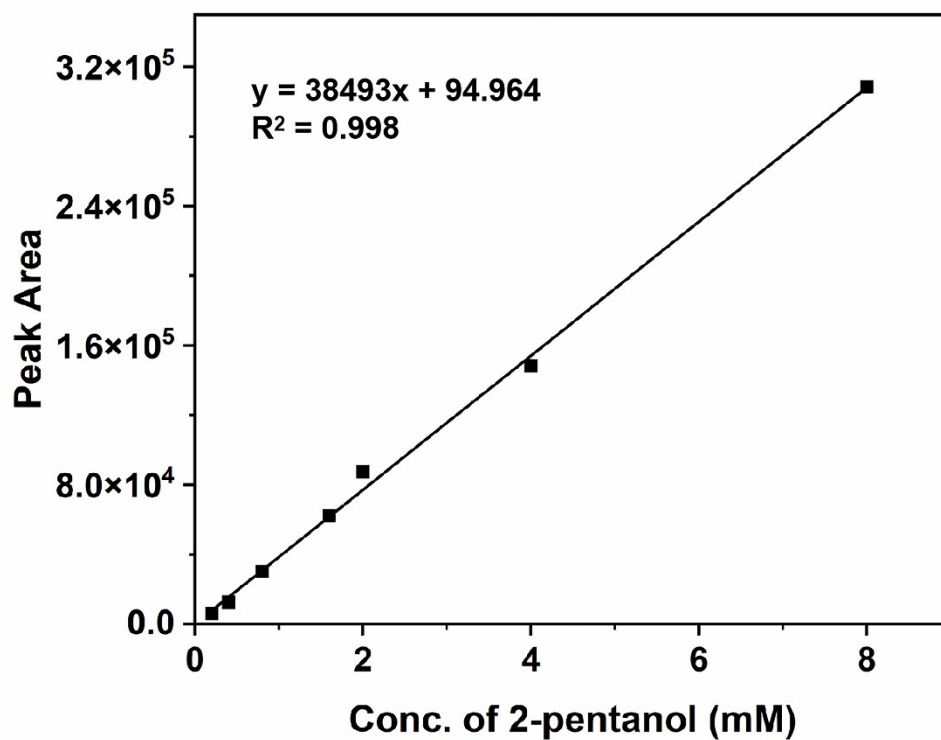

**Figure S18.** Standard curve for the quantification of 2-pentanol (2c). (Agilent CYCLOSIL-B, temperature conditions: initial temperature 40 °C, holding 10 min, then 2 °C/min to 80 °C, then 30 °C/min to 210 °C, holding 5 min).

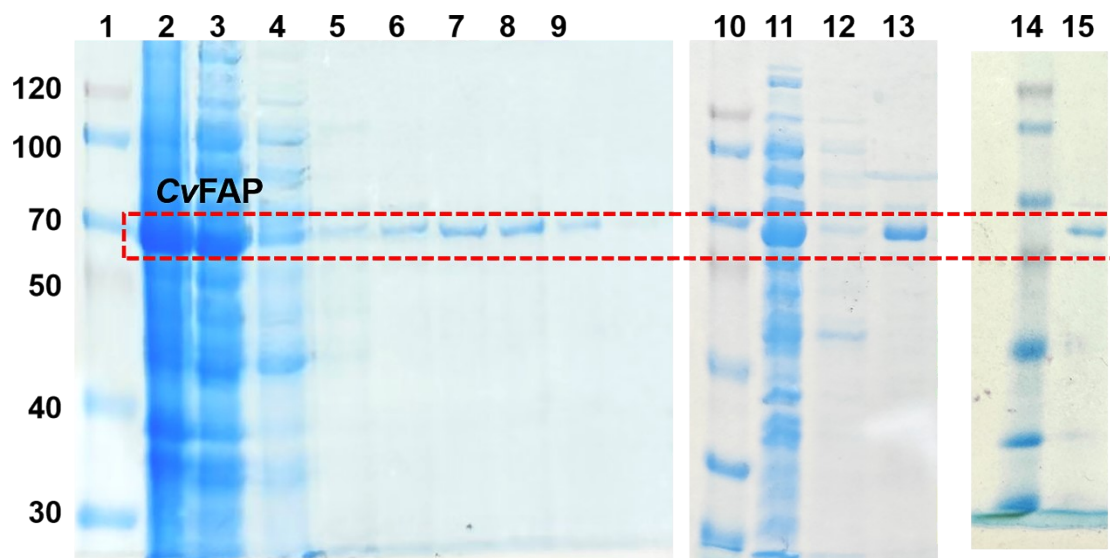

**Figure S19.** SDS-PAGE analysis of purified WT and variants enzymes of CvFAP. Lane 1, 10 and 14: protein markers. Lane 2-9: purified enzyme of WT, 2: filtered cell extract of WT crude enzyme, 3: flow-through of WT, 4: 50 mM imidazole eluate, 5: 100 mM imidazole eluate, 6: 150 mM imidazole eluate, 7: 200 mM imidazole eluate, 8: 250 mM imidazole eluate, 9: 300 mM imidazole eluate. Lane 11-13: purified enzyme of V463A, 11: flow-through of V463A, 12: 50 mM imidazole eluate, 13: 300 mM imidazole eluate. Lane 15: 300 mM imidazole eluate of V463T.

## **Experimental Section**

### **Materials.**

All the reagents were purchased from commercial suppliers ( $\beta$ -hydroxydecanoic acid,  $\beta$ -hydroxycaproic acid,  $\beta$ -hydroxyoctanoic acid and  $\beta$ -hydroxydodecanoic acid were purchased from Macklin, other reagents were purchased from Adamas).

### **Strains and chemicals.**

The sequence of CvFAP was commercially synthesized (GENEWIZ, Wuxi, China). All plasmids were from our laboratory and expressed in *Escherichia. coli* BL21 (DE3). Primers used in polymerase chain reaction (PCR) in this work are listed in Table S5. Reagents for PCR were obtained from Takara Biotechnology (Otsu, Japan). Prime Star Max Polymerase used in QuikChange site-directed mutagenesis method was obtained from Takara Biotechnology (Otsu, Japan). *E. coli* strains were grown in Luria-Bertani (LB) medium at 37 °C. Antibiotics were added as kanamycin (50  $\mu$ g/mL).

### **Mutant Construction.**

Site-directed mutagenesis was performed via whole-plasmid amplification using PrimeSTAR DNA Polymerase (Takara, Japan). The PCR mixture (20  $\mu$ L) contained 10  $\mu$ L of enzyme premix, 0.5  $\mu$ M each of forward and reverse primers (1  $\mu$ L each) and 40 ng of plasmid template. The amplification protocol was as follows: initial denaturation at 98 °C for 10 min; 25 cycles of denaturation at 98 °C for 30 s, annealing at a temperature determined by the primer  $T_m$  for 30 s, and extension at 72 °C for 1 min 20

s; followed by a final extension at 72 °C for 10 min, and then cooling to 16 °C for 10 min. After amplification, the reaction mixture was digested with DpnI restriction enzyme (Takara, Japan) to remove the methylated template DNA. The resulting amplified plasmid was transformed into competent *E. coli* cells, which were then spread on LB agar plates containing kanamycin (50 mg/L). The plates were incubated at 37 °C for 12 h. Single colonies were picked and the mutation sites were verified by DNA sequencing. Successfully mutated strains were stored for further use.

### **Protein Expression.**

The strain pET28b-CvFAP (BL21) provided by the company was streaked onto LB agar plates containing kanamycin at a final concentration of 50 mg/L. The plates were incubated overnight (12 h) in a 37 °C incubator. After 12 h of incubation, single colonies were picked from the plates, with 3 biological replicates selected. Each replicate was inoculated into a culture tube containing 4 mL of LB medium supplemented with kanamycin (final concentration 50 mg/L) to prepare seed cultures of the three strains. Following 12 h of seed culture, each seed culture was inoculated at a 2% (v/v) ratio into 100 mL of LB medium containing kanamycin (final concentration 50 mg/L). The inoculated bacterial cultures were incubated in a 37 °C shaking incubator until the optical density at 600 nm (OD<sub>600</sub>) reached 0.6. Isopropyl  $\beta$ -D-1-thiogalactopyranoside (IPTG) was then added to the cultures at a final concentration of 0.1 mM (using a 200 mM stock solution), and the cultures were transferred to a 17 °C

shaking incubator for induction over 18 h. After induction, 40 mL of the bacterial culture was centrifuged at 8000 rpm for 10 min to remove the supernatant. The bacterial pellet was resuspended in 10 mL of Tris-HCl buffer. The resuspended bacterial suspension was subjected to cell disruption using an ultrasonic homogenizer under the following conditions: power 360 W, with a total disruption duration of 10 min. The disrupted suspension was centrifuged at 8000 rpm for 30 min at 4 °C, and the supernatant was collected for subsequent experiments (Fig. S1).

#### **Calculation of Binding Free Energies.**

The binding free energy was estimated using the MM-PBSA/GBSA approach based on molecular dynamics (MD) trajectories. All calculations were performed using GROMACS 2023 with the Intel 2021 compiler and IntelMPI. The analysis procedure is as follows: First, an index file was generated to define the protein (residues 1–586), the ligand (residue 587), and the complex. Subsequently, topology files and corresponding trajectory files were extracted for the ligand (state B), the protein (state A), and the complex (state AB) separately. Potential energies were then computed for each state by rerunning the trajectories with the mdrun module. Finally, the relevant energy terms (including Coulombic, Lennard-Jones, and potential energies) were extracted for the ligand, protein, and complex using the energy tool. The binding free energy was derived by combining the single-trajectory energies of the three states.

#### **Statistical Analysis**

All experiments were performed in triplicate (n = 3 independent replicates), and results are presented as mean  $\pm$  standard deviation (SD). Statistical significance analysis for the data was carried out using GraphPad Prism (version 8.0.1; GraphPad Software, San Diego, CA, USA). One-way analysis of variance (ANOVA) was conducted, followed by Dunnett's multiple comparisons test, in which the mean value of each variant group was compared with that of the wild-type (WT) control group. P-value  $< 0.05$  was considered statistically significant. The corresponding significance levels are indicated in the figures as follows: \* for  $P < 0.05$ , \*\* for  $P < 0.01$ , \*\*\* for  $P < 0.001$ , and \*\*\*\* for  $P < 0.0001$ ; "ns" denotes not significant ( $P \geq 0.05$ ).

## Reference

(1) Pianaro, A. M., C.; Kerr, W. E. ; Singer, R. B.; Patricio, E. F. L. R. A. ; Marsaioli, A. J. Stingless

Bees: Chemical Differences and Potential Functions in *Nannotrigona testaceicornis* and *Plebeia droryana*

Malesand Workers. *J. Chem. Ecol.* **2009**, *35*, 1117–1128.
